# Supplementary material for: Comparative Evaluation of GS-441524, Teriflunomide, Ruxolitinib, Molnupiravir, Ritonavir, and Nirmatrelvir for In Vitro Antiviral Activity against Feline Infectious Peritonitis Virus
Source: MDPI journal article supplement (doi:10.3390/vetsci10080513), 2023-08-09
Supplement: s1 [file s1]

**Table S2. Percent inhibition response by six drugs (1:2 dilutions) against FIPV in CRFK cells**

| Drug<br>( $\mu$ M) | GS441524           |              |     | Teriflunomide      |              |      | Ruxolitinib        |              |      | Molnupiravir       |              |     | Ritonavir          |              |      | Nirmatrelvir       |              |     |
|--------------------|--------------------|--------------|-----|--------------------|--------------|------|--------------------|--------------|------|--------------------|--------------|-----|--------------------|--------------|------|--------------------|--------------|-----|
|                    | Copy number        | % inhibition | CPE | Copy number        | % inhibition | CP E | Copy number        | % inhibition | CP E | Copy number        | % inhibition | CPE | Copy number        | % inhibition | CP E | Copy number        | % inhibition | CPE |
| <b>0.00</b>        | $3.36 \times 10^6$ | 0.00         | Yes | $3.36 \times 10^6$ | 0.00         | Yes  | $3.36 \times 10^6$ | 0.00         | Yes  | $3.36 \times 10^6$ | 0.00         | Yes | $3.36 \times 10^6$ | 0.00         | Yes  | $3.36 \times 10^6$ | 0.00         | Yes |
| <b>0.98</b>        | $2.60 \times 10^6$ | 22.50        | Yes | $2.27 \times 10^6$ | 32.27        | Yes  | $3.48 \times 10^6$ | 0.00         | Yes  | $3.47 \times 10^6$ | 0.00         | Yes | $4.33 \times 10^6$ | 0.00         | Yes  | $2.93 \times 10^6$ | 12.74        | Yes |
| <b>1.95</b>        | $1.23 \times 10^6$ | 63.34        | Yes | $1.66 \times 10^6$ | 50.67        | Yes  | $2.13 \times 10^6$ | 36.66        | Yes  | $2.63 \times 10^6$ | 21.61        | Yes | $4.60 \times 10^6$ | 0.00         | Yes  | $2.02 \times 10^6$ | 39.94        | Yes |
| <b>3.90</b>        | $4.08 \times 10^5$ | 87.84        | Yes | $2.02 \times 10^6$ | 39.87        | Yes  | $2.58 \times 10^6$ | 23.25        | Yes  | $2.07 \times 10^6$ | 38.30        | Yes | $3.20 \times 10^6$ | 4.62         | Yes  | $1.05 \times 10^6$ | 68.83        | Yes |
| <b>7.80</b>        | $5.87 \times 10^4$ | 98.25        | No  | $1.32 \times 10^6$ | 60.58        | Yes  | $4.52 \times 10^6$ | 0.00         | Yes  | $2.06 \times 10^6$ | 38.52        | Yes | $2.90 \times 10^6$ | 13.64        | Yes  | $5.62 \times 10^4$ | 98.33        | No  |
| <b>15.65</b>       | $3.93 \times 10^4$ | 98.83        | No  | $1.50 \times 10^6$ | 55.29        | Yes  | $6.17 \times 10^6$ | 0.00         | Yes  | $1.01 \times 10^6$ | 69.84        | Yes | $2.57 \times 10^6$ | 23.55        | Yes  | $3.72 \times 10^4$ | 98.89        | No  |
| <b>31.25</b>       | $3.92 \times 10^4$ | 98.83        | No  | $1.17 \times 10^6$ | 65.14        | Yes  | $4.55 \times 10^6$ | 0.00         | Yes  | $7.89 \times 10^5$ | 76.48        | Yes | $7.39 \times 10^5$ | 77.99        | Yes  | $2.78 \times 10^4$ | 99.17        | No  |
| <b>62.50</b>       | $4.13 \times 10^4$ | 98.77        | No  | $1.29 \times 10^6$ | 61.70        | Yes  | $1.48 \times 10^6$ | 56.04        | Yes  | $5.83 \times 10^5$ | 82.63        | Yes | $5.61 \times 10^4$ | 98.33        | Yes  | $3.70 \times 10^4$ | 98.90        | No  |
| <b>125</b>         | $3.34 \times 10^4$ | 99.00        | No  | $5.12 \times 10^5$ | 84.73        | Yes  | $1.99 \times 10^6$ | 40.83        | Yes  | $1.89 \times 10^5$ | 94.38        | Yes | $5.60 \times 10^4$ | 98.33        | HT   | $3.24 \times 10^4$ | 99.04        | No  |
| <b>250</b>         | $6.32 \times 10^4$ | 98.12        | Yes | $3.33 \times 10^5$ | 90.09        | Yes  | $2.40 \times 10^6$ | 28.61        | Yes  | $6.08 \times 10^4$ | 98.19        | Yes | $5.61 \times 10^4$ | 98.33        | HT   | $3.38 \times 10^4$ | 98.99        | Yes |
