# Supplementary material for: Comparative Evaluation of GS-441524, Teriflunomide, Ruxolitinib, Molnupiravir, Ritonavir, and Nirmatrelvir for In Vitro Antiviral Activity against Feline Infectious Peritonitis Virus
Source: MDPI journal article supplement (doi:10.3390/vetsci10080513), 2023-08-09
Supplement: s1 [file s1]

**Table S1. Percent inhibition response by six drugs (serial 1:10 dilutions) against FIPV in CRFK cells**

| Drug<br>( $\mu\text{M}$ ) | GS441524           |              |     | Teriflunomide      |              |     | Ruxolitinib        |              |     | Molnupiravir       |              |     | Ritonavir          |              |     | Nirmatrelvir       |              |     |
|---------------------------|--------------------|--------------|-----|--------------------|--------------|-----|--------------------|--------------|-----|--------------------|--------------|-----|--------------------|--------------|-----|--------------------|--------------|-----|
|                           | Copy number        | % inhibition | CPE |
| <b>0.00</b>               | $4.36 \times 10^6$ | 0.00         | Yes | $8.06 \times 10^6$ | 0.00         | Yes | $8.06 \times 10^6$ | 0.00         | Yes |
| <b>0.05</b>               | $2.52 \times 10^6$ | 42.18        | Yes | $4.32 \times 10^6$ | 0.92         | Yes | $7.00 \times 10^6$ | 0.00         | Yes | $2.18 \times 10^6$ | 49.88        | Yes | $6.82 \times 10^6$ | 15.40        | Yes | $8.04 \times 10^6$ | 0.29         | Yes |
| <b>0.50</b>               | $6.62 \times 10^5$ | 84.82        | Yes | $3.65 \times 10^6$ | 16.37        | Yes | $1.47 \times 10^6$ | 66.37        | Yes | $2.47 \times 10^6$ | 43.37        | Yes | $8.73 \times 10^6$ | 0.00         | Yes | $8.79 \times 10^6$ | 0.00         | Yes |
| <b>5.00</b>               | $2.67 \times 10^5$ | 93.89        | No  | $2.72 \times 10^6$ | 37.67        | Yes | $3.38 \times 10^6$ | 22.54        | Yes | $1.52 \times 10^6$ | 65.16        | Yes | $6.91 \times 10^6$ | 14.28        | Yes | $1.58 \times 10^6$ | 80.38        | No  |
| <b>50.00</b>              | $1.34 \times 10^4$ | 99.69        | No  | $7.62 \times 10^5$ | 82.52        | Yes | $3.62 \times 10^6$ | 16.92        | Yes | $1.14 \times 10^6$ | 73.83        | Yes | $2.81 \times 10^4$ | 99.65        | Yes | $3.18 \times 10^4$ | 99.61        | No  |
| <b>500.00</b>             | $1.37 \times 10^4$ | 99.69        | Yes | $3.27 \times 10^4$ | 99.25        | Yes | $4.51 \times 10^4$ | 98.97        | Yes | $1.71 \times 10^5$ | 96.07        | Yes | $3.38 \times 10^4$ | 99.58        | Yes | $2.38 \times 10^4$ | 99.70        | Yes |
